# Supplementary material for: Predicting Subnational Ebola Virus Disease Epidemic Dynamics from Sociodemographic Indicators
Source: PubMed Central journal article supplement (PMC5061396; doi:10.1371/journal.pone.0163544), 2016-10-12
Supplement: pone.0163544.s007.pdf [file pone.0163544.s007.pdf]

# Predicting subnational Ebola virus disease epidemic dynamics from sociodemographic indicators

Table S1. Descriptive statistics for growth rates estimates (exponential fit, logistic fit, polynomial fit), final epidemic sizes and socio-economic covariates at the regional level.

|                                                       | Mean    | S.D.    | range                |
|-------------------------------------------------------|---------|---------|----------------------|
| Wealth Index (iwi)                                    | 24.7    | 11.1    | (13.7 - 69.8)        |
| Average number of years of education                  | 3.72    | 1.66    | (1.50 - 8.20)        |
| Proportion Christian                                  | 0.43    | 0.36    | (0.01 - 0.961)       |
| Proportion Muslim                                     | 0.54    | 0.38    | (0.01 - 0.99)        |
| Urbanicity (% of respondents in urban sampling units) | 31.0    | 25.0    | (4.87 - 100)         |
| Week from start of EVD epidemic                       | 12.4    | 7.4     | (0 - 20)             |
| Population size                                       | 487,715 | 479,768 | (57,913 - 1,936,329) |
| Population density (per $km^2$ )                      | 4,852   | 25,864  | (22 - 154,283)       |
| Average age                                           | 29.9    | 1.15    | (27.7 - 32.9)        |
| % Female                                              | 48.0    | 0.10    | (31.9 - 63.0)        |
| Final Epidemic size                                   | 583     | 777.4   | (2.00 - 3,146)       |
| Exponential growth rate                               | 0.04    | 0.02    | (0.00 - 0.14)        |
| Logistic growth rate                                  | 0.15    | 0.33    | (0.00 - 2.00)        |
| Polynomial growth rate                                | 2.00    | 2.19    | (0.05 - 11.78)       |
| Final Epidemic percent (% of residents infected )     | 0.014   | 0.188   | (0.001 - 0.985)      |

Note: Epidemic growth rates based on first 15 weeks of cases in each ADM2.
